# Supplementary material
Source: PubMed Central journal article supplement (PMC3037656)
Supplement: supp_M110.205054_jbc.M110.205054-1.pdf [file supp_M110.205054_jbc.M110.205054-1.pdf]

**Supplementary Table 1: Yeast strains generated for this study**

| Strain   | Relevant genotype                                         |
|----------|-----------------------------------------------------------|
| JB37D-8D | MATa CDC14-5GFP-TRP1 net1::HIS3 + pRRN3-LEU2              |
| JB78-12C | MATa cdc15-2-ADE1 ADE2 CDC14-5GFP::TRP1                   |
| JB198    | MATa BNI1-PrA::HIS3 ADE2                                  |
| JB216    | MATa BNR1-PrA::HIS3 ADE2                                  |
| JB208    | MATa MAD1-PrA::HIS3 ADE2                                  |
| JB197    | MATa KAR9-PrA::HIS3 ADE2                                  |
| JB299    | MATa trp1::GALS-CDC14-5GFP-TRP1                           |
| JB300    | MATa trp1::GALS-D253A-5GFP-TRP                            |
| JB295    | MATa trp1::GALS-CDC14-FLAG-TRP1                           |
| JB296    | MATa trp1::GALS-D253A-FLAG-TRP1                           |
| JB315    | MATa NET1-6HA-TRP1 ADE2                                   |
| JB320    | MATa NET1-6HA-TRP1 trp1::GALS-CDC14-FLAG-TRP1 ADE2        |
| JB321    | MATa NET1-6HA-TRP1 trp1::GALS-CDC14-D253A-FLAG-TRP1 ADE2  |
| JB316    | MATa BNI1-6HA-TRP1 ADE2                                   |
| JB322    | MATa BNI1-6HA-TRP1 trp1::GALS-CDC14-FLAG-TRP1 ADE2        |
| JB323    | MATa BNI1-6HA-TRP1 trp1::GALS-CDC14-D253A-FLAG-TRP1 ADE2  |
| JB317    | MATa BNR1-6HA-TRP1 ADE2                                   |
| JB324    | MATa BNR1-6HA-TRP1 trp1::GALS-CDC14-FLAG-TRP1 ADE2        |
| JB325    | MATa BNR1-6HA-TRP1 trp1::GALS-CDC14-D253A-FLAG-TRP1 ADE2  |
| JB318    | MATa KAR9-6HA-TRP1 ADE2                                   |
| JB326    | MATa KAR9-6HA-TRP1 trp1::GALS-CDC14-FLAG-TRP1 ADE2        |
| JB327    | MATa KAR9-6HA-TRP1 trp1::GALS-CDC14-D253A-FLAG-TRP1 ADE2  |
| JB399    | MATa SF11-6HA-TRP1 ADE2                                   |
| JB404    | MATa SF11-6HA-TRP1 trp1::GALS-CDC14-FLAG-TRP1             |
| JB405    | MATa SF1-6HA-TRP1 trp1::GALS-D253A-FLAG-TRP1              |
| JB400    | MATa GIN4-6HA-TRP1 ADE2                                   |
| JB406    | MATa GIN4-6HA-TRP1 trp1::GALS-CDC14-FLAG-TRP1             |
| JB407    | MATa GIN4-6HA-TRP1 trp1::GALS-D253A-FLAG-TRP1             |
| JB416    | MATa HSL1-6HA-TRP1 ADE2                                   |
| JB418    | MATa HSL1-6HA-TRP1 trp1::GALS-CDC14-FLAG-TRP1             |
| JB419    | MATa HSL1-6HA-TRP1 trp1::GALS-D253A-FLAG-TRP1             |
| JB401    | MATa DMA2-6HA-TRP1 ADE2                                   |
| JB408    | MATa DMA2-6HA-TRP1 ADE2 trp1::GALS-CDC14-FLAG-TRP1        |
| JB409    | MATa DMA2-6HA-TRP1 ADE2 trp1::GALS-D253A-FLAG-TRP1        |
| JB402    | MATa NUD1-6HA-TRP1 ADE2                                   |
| JB410    | MATa NUD1-6HA-TRP1 trp1::GALS-CDC14-FLAG-TRP1             |
| JB411    | MATa NUD1-6HA-TRP1 trp1::GALS-D253A-FLAG-TRP1             |
| JB319    | MATa SLI15-6HA-TRP1 ADE2                                  |
| JB328    | MATa SLI15-6HA-TRP1 trp1::GALS-CDC14-FLAG-TRP1 ADE2       |
| JB329    | MATa SLI15-6HA-TRP1 trp1::GALS-CDC14-D253A-FLAG-TRP1 ADE2 |
| JB395    | MATa BNI1-6HA-TRP1 URA3::GAL-CLB2 ADE2                    |
| JB396    | MATa BNR1-6HA-TRP1 URA3::GAL-CLB2 ADE2                    |
| JB397    | MATa KAR9-6HA-TRP1 URA3::GAL-CLB2 ADE2                    |
| JB398    | MATa SLI15-6HA-TRP1 URA3::GAL-CLB2 ADE2                   |
| ALG813   | MATa bni1::BNI1-3GFP-LEU2 cdc20::MET3-HA3-CDC20-TRP1 ADE2 |
| ALG815   | MATa bnr1::BNR1-GFP-HIS3 cdc20::MET-CDC20-TRP1 ADE2       |

|         |                                                                                                         |
|---------|---------------------------------------------------------------------------------------------------------|
| ALG833  | MATa bni1::BNI1-3GFP-LEU2 cdc20::MET3-HA3-CDC20-TRP1 ADE2 + pURA3                                       |
| ALG834  | MATa bni1::BNI1-3GFP-LEU2 cdc20::MET3-HA3-CDC20-TRP1 ADE2 + pGALL-CDC14-URA3                            |
| ALG835  | MATa bni1::BNI1-3GFP-LEU2 cdc20::MET3-HA3-CDC20-TRP1 ADE2 + pGALL-cdc14D253A-URA3                       |
| ALG836  | MATa bnr1::BNR1-GFP-HIS3 cdc20::MET3-HA3-CDC20-TRP1 ADE2 + pURA3                                        |
| ALG837  | MATa bnr1::BNR1-GFP-HIS3 cdc20::MET3-HA3-CDC20-TRP1 ADE2 + pGALL-CDC14-URA3                             |
| ALG838  | MATa bnr1::BNR1-GFP-HIS3 cdc20::MET3-HA3-CDC20-TRP1 ADE2 + pGALL-cdc14D253A-URA3                        |
| ALG1015 | MATa bnr1::BNR1-GFP-HIS3 NET1-CFP-KanMX ESP1::GALS-ESP1-URA3 cdh1::LEU2 cdc20::MET3-HA3-CDC20-TRP1 ADE2 |
| ALG1045 | MATa bni1::BNI1-3GFP-LEU2 ESP1::GALS-ESP1-URA3 cdh1::LEU2 cdc20::MET3-HA3-CDC20-TRP1 ADE2               |
