# Supplementary material
Source: PubMed Central journal article supplement (PMC3037656)
Supplement: supp_M110.205054_jbc.M110.205054-2.pdf [file supp_M110.205054_jbc.M110.205054-2.pdf]

**Supplementary Table 2: Additional proteins associated with Cdc14-5GFP from *Δnet1* and *cdc15-2* cells.**

| <i>Δnet1 CDC14-5GFP</i>   |                  |                    |
|---------------------------|------------------|--------------------|
| <b>Metabolism</b>         | <b>Chaperone</b> | <b>Translation</b> |
| Atp3                      | Hsc82            | Bms1               |
| Eno2                      | Ssa1             | Rpg1               |
| Fba1                      | Ssa2             | Rpl16b             |
| Pma1                      | Ssb1             | Rpp0               |
| Tdh3                      |                  | Rps3               |
| Ura2                      |                  | Rps14a             |
| Yor251c                   |                  | Rps24b             |
|                           |                  | Rps25A             |
|                           |                  | Tef2               |
| <i>cdc15-2 CDC14-5GFP</i> |                  |                    |
| <b>Metabolism</b>         | <b>Chaperone</b> | <b>Translation</b> |
| Ura2                      | Hsc82            | Ret2               |
| Vma2                      | Ssa2             |                    |
