# Supplementary material
Source: PubMed Central journal article supplement (PMC3037656)
Supplement: supp_M110.205054_jbc.M110.205054-3.pdf [file supp_M110.205054_jbc.M110.205054-3.pdf]

**Supplementary Table 3: Additional proteins associated with galactose-induced Cdc14-D253A-5GFP.**

| <b>Metabolism</b> | <b>Chaperone</b> | <b>Translation</b> |
|-------------------|------------------|--------------------|
| Adh1              | Hsp42            | Asc1               |
| Adh2              | Hsp82            | Brx1               |
| Ams1              | Ssa1             | Eft1               |
| Atp2              | Ssa2             | Rpl2a              |
| <b>Cdc19 (1)</b>  | Ssb1             | Rpl4b              |
| Cps1              |                  | Rpl5               |
| Fox2              |                  | Rpl9b              |
| Gal10             |                  | Rpl17              |
| Gpm1              |                  | Rps0a              |
| Gut2              |                  | Rps5               |
| Hem1              |                  | Rps10a             |
| Hfa1              |                  | Rps12              |
| Mss1              |                  | Rps14a             |
| Pet12             |                  | Rps21a             |
| Pma1              |                  | Rps24a             |
| Pma2              |                  | Sol2               |
| Ptp2              |                  | Tef2               |
| Sam1              |                  | Yra1               |
| Tdh3              |                  |                    |
| Tsa1              |                  |                    |
| Vmr1              |                  |                    |
