# Supplementary material
Source: PubMed Central journal article supplement (PMC3037656)
Supplement: supp_M110.205054_jbc.M110.205054-5.pdf [file supp_M110.205054_jbc.M110.205054-5.pdf]

## SUPPLEMENTAL INFORMATION

Supplemental Table 1. Strains generated for this study.

Supplemental Table 2. Additional proteins associated with Cdc14-5GFP from *Δnet1* and *cdc15-2* cells.

Supplemental Table 3. Additional proteins associated with galactose-induced Cdc14-D253A-5GFP.

Supplemental Figure 1. Enhanced binding of Cdc14 interactors to a substrate-trapping Cdc14 mutant *in vivo*. Immunopurifications of FLAG-tagged Cdc14 from strains transiently expressing wild-type Cdc14 (*GALS-WT-FLAG*) or the substrate-trapping Cdc14 mutant (*GALS-D253A-FLAG*) in combination with the indicated 6HA-tagged proteins (left panels) and whole cell extract from these strains (right panels). Immunoprecipitates and extracts were resolved on SDS-PAGE gels and immunoblotted with an antibody to the HA tag or to Cdc14.
