# Supplementary material
Source: PubMed Central journal article supplement (PMC3037656)

Supplementary Figure 1

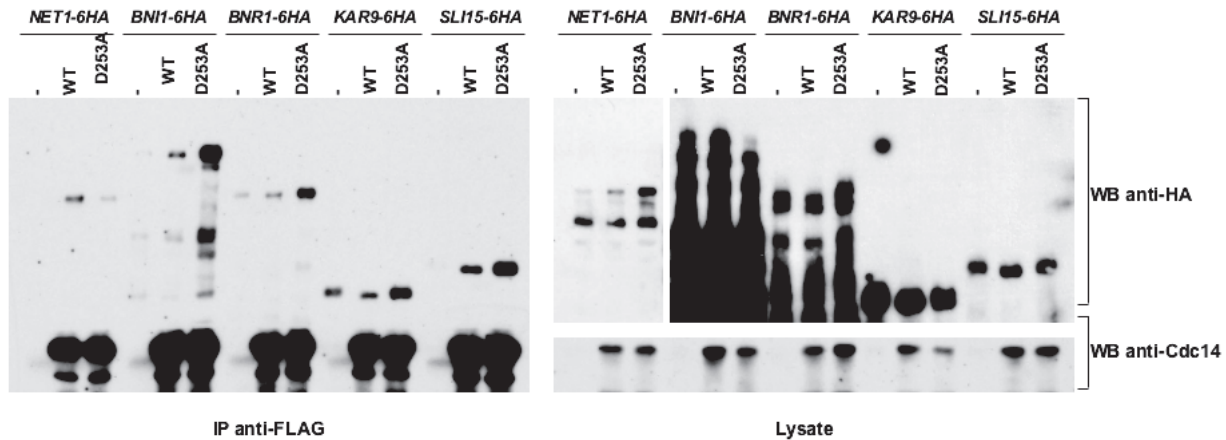

Supplement: supp_M110.205054_jbc.M110.205054-4.pdf [file supp_M110.205054_jbc.M110.205054-4.pdf]
